# Supplementary material for: Profile of Twenty-Three Human Milk Oligosaccharides in Han Chinese Mothers throughout Postpartum 1 year
Source: Hindawi journal article supplement (doi:10.1155/2022/6230832), 2022-04-18
Supplement: f1 [file 6230832.f1.zip]

Archive with 2 entries (2 files):
- 6230832.f1/Supplement 1.pdf
- 6230832.f1/Supplement 2.pdf
