# Supplementary material for: Profile of Twenty-Three Human Milk Oligosaccharides in Han Chinese Mothers throughout Postpartum 1 year
Source: Hindawi journal article supplement (doi:10.1155/2022/6230832), 2022-04-18
Supplement: f1 [file 6230832.f1.zip]

| Items                                                | Lactation time | Parity  | Delivery mode | Secretor | Lewis type |
|------------------------------------------------------|----------------|---------|---------------|----------|------------|
| 2'FL                                                 | 0.188          | -0.427* | -0.135        | -0.926** | 0.597**    |
| LDFT                                                 | 0.099          | -0.271  | -0.073        | -0.871** | 0.438*     |
| LNFP I                                               | 0.032          | -0.03   | -0.096        | -0.926** | 0.597**    |
| LNDFH I                                              | 0.013          | -0.05   | -0.101        | -0.911** | 0.569**    |
| 3'SL                                                 | 0.229          | -0.134  | 0.144         | -0.169   | 0.219      |
| LNnT                                                 | -0.293         | 0.088   | 0.157         | -0.254   | 0.313      |
| LNnDFH I                                             | -0.353         | -0.205  | -0.126        | -0.377   | 0.243      |
| DFLNHa                                               | -0.232         | -0.245  | -0.102        | -0.509*  | 0.328      |
| 3FL                                                  | -0.024         | 0.175   | -0.132        | 0.445*   | -0.779**   |
| LNnDFH II                                            | -0.207         | 0.136   | -0.217        | 0.47*    | -0.784**   |
| 6'SL                                                 | -0.665**       | 0.332   | 0.157         | 0.144    | -0.268     |
| LSTc                                                 | -0.608**       | 0.261   | -0.012        | -0.036   | -0.09      |
| MFLNnH                                               | -0.698**       | 0.297   | -0.122        | 0.072    | -0.23      |
| LNDFH II                                             | -0.487*        | 0.12    | -0.072        | -0.337   | -0.085     |
| LNT                                                  | -0.485*        | 0.376   | 0.313         | 0.373    | 0.036      |
| DSLNT                                                | -0.59**        | 0.256   | 0.278         | 0.472*   | -0.313     |
| MFLNH III                                            | -0.641**       | 0.407*  | -0.024        | 0.353    | -0.048     |
| LSTb                                                 | -0.5*          | 0.558** | 0.289         | 0.77**   | -0.508*    |
| LNFP III                                             | -0.659**       | 0.271   | -0.036        | 0.349    | -0.309     |
| DFpLNnH                                              | -0.722**       | 0.147   | -0.08         | 0.337    | -0.584**   |
| LNFP II                                              | -0.542**       | 0.392   | 0             | 0.518**  | -0.843**   |
| 3'SLNFP II & 6'SLNFP VI                              | -0.606**       | 0.339   | 0.024         | 0.361    | -0.704**   |
| * represents $p < 0.05$ , ** represents $p < 0.01$ . |                |         |               |          |            |
