# Supplementary material for: Profile of Twenty-Three Human Milk Oligosaccharides in Han Chinese Mothers throughout Postpartum 1 year
Source: Hindawi journal article supplement (doi:10.1155/2022/6230832), 2022-04-18
Supplement: f1 [file 6230832.f1.zip]

| Items                 | 2FL      | 3FL      | 3SL      |
|-----------------------|----------|----------|----------|
| 2'FL                  | 1.000    | -0.438*  | -0.072   |
| 3FL                   | -0.438*  | 1.000    | -0.203   |
| 3'SL                  | -0.072   | -0.203   | 1.000    |
| 6'SL                  | -0.057   | -0.439*  | -0.251   |
| LNT                   | -0.372   | -0.488*  | 0.687**  |
| LNnT                  | 0.052    | -0.774** | 0.461*   |
| LDFT                  | 0.907**  | -0.448*  | -0.194   |
| LNFP I                | 0.715**  | -0.464*  | -0.257   |
| LNFP III              | -0.242   | -0.333   | 0.821**  |
| LNFP II               | -0.631** | 0.510*   | -0.596** |
| LSTb                  | -0.617** | -0.133   | 0.700**  |
| LSTc                  | 0.057    | -0.516*  | -0.210   |
| LNnDFH II             | -0.511*  | 0.840**  | -0.194   |
| LNDFH II              | 0.392    | 0.122    | -0.693** |
| LNDFH I               | 0.721**  | -0.488*  | -0.249   |
| LNnDFH I              | 0.080    | -0.038   | 0.050    |
| DSLNT                 | -0.594** | -0.322   | 0.170    |
| 3'SLNFP II&6'SLNFP VI | -0.414   | 0.200    | -0.589** |
| MFLNnH                | -0.229   | -0.234   | -0.354   |
| MFLNH III             | -0.408   | -0.474*  | 0.311    |
| DFpLNnH               | -0.440*  | 0.109    | -0.481*  |
| DFLNHa                | 0.781**  | -0.355   | 0.124    |
| Proteobacteria        | 0.090    | -0.503*  | 0.268    |
| Firmicutes            | -0.125   | 0.410    | -0.149   |
| Bacteroidetes         | -0.051   | 0.279    | -0.201   |
| Actinobacteria        | 0.211    | 0.246    | -0.355   |
| Acidobacteria         | 0.580**  | -0.236   | -0.168   |
| Cyanobacteria         | 0.599**  | -0.124   | -0.232   |
| Chloroflexi           | 0.504*   | -0.156   | -0.319   |
| Planctomycetes        | 0.482*   | -0.032   | -0.273   |
| [Thermi]              | 0.427    | -0.126   | -0.077   |

\* represents  $p < 0.05$ , \*\* represents  $p < 0.01$ .

| <b>6SL</b> | <b>LNT</b> | <b>LNnT</b> | <b>LDFT</b> |
|------------|------------|-------------|-------------|
| -0.057     | -0.372     | 0.052       | 0.907**     |
| -0.439*    | -0.488*    | -0.774**    | -0.448*     |
| -0.251     | 0.687**    | 0.461*      | -0.194      |
| 1.000      | 0.105      | 0.176       | 0.048       |
| 0.105      | 1.000      | 0.791**     | -0.413      |
| 0.176      | 0.791**    | 1.000       | 0.052       |
| 0.048      | -0.413     | 0.052       | 1.000       |
| 0.047      | -0.310     | 0.237       | 0.807**     |
| -0.142     | 0.869**    | 0.630**     | -0.353      |
| 0.157      | -0.278     | -0.483*     | -0.602**    |
| -0.022     | 0.887**    | 0.492*      | -0.643**    |
| 0.899**    | 0.065      | 0.263       | 0.244       |
| -0.361     | -0.365     | -0.636**    | -0.481*     |
| -0.083     | -0.771**   | -0.504*     | 0.518*      |
| 0.083      | -0.339     | 0.139       | 0.903**     |
| -0.156     | -0.058     | -0.001      | 0.135       |
| 0.516*     | 0.674**    | 0.429       | -0.592**    |
| 0.499*     | -0.278     | -0.415      | -0.297      |
| 0.685**    | 0.073      | 0.151       | -0.247      |
| 0.572**    | 0.741**    | 0.582**     | -0.475*     |
| 0.215      | -0.065     | -0.176      | -0.342      |
| 0.063      | -0.263     | -0.053      | 0.595**     |
| 0.246      | 0.374      | 0.596**     | 0.182       |
| -0.283     | -0.216     | -0.407      | -0.190      |
| 0.008      | -0.268     | -0.412      | -0.122      |
| -0.205     | -0.481*    | -0.444*     | 0.224       |
| 0.313      | -0.312     | -0.169      | 0.477*      |
| -0.187     | -0.336     | -0.016      | 0.468*      |
| 0.247      | -0.365     | -0.232      | 0.573**     |
| -0.138     | -0.372     | -0.272      | 0.438*      |
| -0.126     | -0.266     | 0.054       | 0.357       |

---



---

| <b>LNFP I</b> | <b>LNFP III</b> | <b>LNFP II</b> | <b>LSTb</b> |
|---------------|-----------------|----------------|-------------|
| 0.715**       | -0.242          | -0.631**       | -0.617**    |
| -0.464*       | -0.333          | 0.510*         | -0.133      |
| -0.257        | 0.821**         | -0.596**       | 0.700**     |
| 0.047         | -0.142          | 0.157          | -0.022      |
| -0.310        | 0.869**         | -0.278         | 0.887**     |
| 0.237         | 0.630**         | -0.483*        | 0.492*      |
| 0.807**       | -0.353          | -0.602**       | -0.643**    |
| 1.000         | -0.298          | -0.473*        | -0.559**    |
| -0.298        | 1.000           | -0.457*        | 0.799**     |
| -0.473*       | -0.457*         | 1.000          | -0.052      |
| -0.559**      | 0.799**         | -0.052         | 1.000       |
| 0.262         | -0.127          | -0.017         | -0.090      |
| -0.482*       | -0.153          | 0.509*         | -0.033      |
| 0.498*        | -0.754**        | 0.213          | -0.707**    |
| 0.881**       | -0.339          | -0.496*        | -0.581**    |
| 0.178         | -0.126          | -0.07          | -0.122      |
| -0.503*       | 0.440*          | 0.333          | 0.641**     |
| -0.290        | -0.438*         | 0.760**        | -0.119      |
| -0.161        | -0.235          | 0.499*         | -0.050      |
| -0.364        | 0.505*          | 0.110          | 0.618**     |
| -0.284        | -0.103          | 0.617**        | 0.018       |
| 0.360         | -0.062          | -0.495*        | -0.424      |
| 0.222         | 0.254           | -0.328         | 0.259       |
| -0.191        | -0.147          | 0.243          | -0.173      |
| -0.157        | -0.173          | 0.244          | -0.088      |
| 0.044         | -0.351          | 0.088          | -0.564**    |
| 0.146         | -0.253          | -0.219         | -0.517*     |
| 0.623**       | -0.253          | -0.270         | -0.500*     |
| 0.218         | -0.371          | -0.173         | -0.526*     |
| 0.274         | -0.294          | -0.124         | -0.478*     |
| 0.207         | -0.107          | -0.147         | -0.392      |

---



---

| LSTc    | LNnDFH II | LNDFH II | LNDFH I  |
|---------|-----------|----------|----------|
| 0.057   | -0.511*   | 0.392    | 0.721**  |
| -0.516* | 0.840**   | 0.122    | -0.488*  |
| -0.210  | -0.194    | -0.693** | -0.249   |
| 0.899** | -0.361    | -0.083   | 0.083    |
| 0.065   | -0.365    | -0.771** | -0.339   |
| 0.263   | -0.636**  | -0.504*  | 0.139    |
| 0.244   | -0.481*   | 0.518*   | 0.903**  |
| 0.262   | -0.482*   | 0.498*   | 0.881**  |
| -0.127  | -0.153    | -0.754** | -0.339   |
| -0.017  | 0.509*    | 0.213    | -0.496*  |
| -0.090  | -0.033    | -0.707** | -0.581** |
| 1.000   | -0.388    | -0.027   | 0.333    |
| -0.388  | 1.000     | 0.157    | -0.490*  |
| -0.027  | 0.157     | 1.000    | 0.547*   |
| 0.333   | -0.490*   | 0.547*   | 1.000    |
| -0.139  | -0.139    | 0.166    | 0.215    |
| 0.387   | -0.128    | -0.529*  | -0.504*  |
| 0.421   | 0.392     | 0.322    | -0.228   |
| 0.460*  | -0.193    | -0.061   | -0.174   |
| 0.374   | -0.388    | -0.621** | -0.393   |
| 0.190   | 0.480*    | 0.231    | -0.256   |
| 0.152   | -0.367    | 0.163    | 0.433    |
| 0.289   | -0.311    | -0.134   | 0.165    |
| -0.260  | 0.221     | -0.0549  | -0.149   |
| -0.125  | 0.234     | 0.300    | -0.149   |
| -0.164  | 0.199     | 0.245    | 0.279    |
| 0.269   | -0.236    | 0.117    | 0.286    |
| -0.146  | -0.209    | 0.288    | 0.424    |
| 0.286   | -0.226    | 0.222    | 0.410    |
| -0.148  | -0.159    | 0.357    | 0.347    |
| 0.062   | -0.116    | 0.056    | 0.229    |

---



---

| <b>L<sub>N</sub>DFH I</b> | <b>DSLNT</b> | <b>3'SLNFP<sub>II</sub>&amp;<br/>6'SLNFP<sub>VI</sub></b> | <b>MFLN<sub>H</sub></b> |
|---------------------------|--------------|-----------------------------------------------------------|-------------------------|
| 0.080                     | -0.594**     | -0.414                                                    | -0.229                  |
| -0.038                    | -0.322       | 0.200                                                     | -0.234                  |
| 0.050                     | 0.170        | -0.589**                                                  | -0.354                  |
| -0.156                    | 0.516*       | 0.499*                                                    | 0.685**                 |
| -0.058                    | 0.674**      | -0.278                                                    | 0.073                   |
| -0.001                    | 0.429        | -0.415                                                    | 0.151                   |
| 0.135                     | -0.592**     | -0.297                                                    | -0.247                  |
| 0.178                     | -0.503*      | -0.290                                                    | -0.161                  |
| -0.126                    | 0.440*       | -0.438*                                                   | -0.235                  |
| -0.070                    | 0.333        | 0.760**                                                   | 0.499*                  |
| -0.122                    | 0.641**      | -0.119                                                    | -0.050                  |
| -0.139                    | 0.387        | 0.421                                                     | 0.460*                  |
| -0.139                    | -0.128       | 0.392                                                     | -0.193                  |
| 0.166                     | -0.529*      | 0.322                                                     | -0.061                  |
| 0.215                     | -0.504*      | -0.228                                                    | -0.174                  |
| 1.000                     | -0.129       | -0.126                                                    | -0.12                   |
| -0.129                    | 1.000        | 0.432                                                     | 0.506*                  |
| -0.126                    | 0.432        | 1.000                                                     | 0.430                   |
| -0.120                    | 0.506*       | 0.430                                                     | 1.000                   |
| -0.150                    | 0.812**      | 0.083                                                     | 0.666**                 |
| -0.132                    | 0.493*       | 0.792**                                                   | 0.235                   |
| -0.014                    | -0.346       | -0.203                                                    | -0.134                  |
| 0.077                     | 0.238        | -0.206                                                    | 0.147                   |
| -0.071                    | -0.141       | 0.068                                                     | -0.121                  |
| -0.028                    | -0.139       | 0.294                                                     | -0.080                  |
| -0.015                    | -0.422       | 0.014                                                     | -0.020                  |
| -0.043                    | -0.192       | 0.025                                                     | 0.215                   |
| -0.058                    | -0.489*      | -0.319                                                    | -0.157                  |
| 0.039                     | -0.277       | 0.048                                                     | 0.001                   |
| 0.386                     | -0.478*      | -0.162                                                    | -0.185                  |
| -0.140                    | -0.155       | -0.135                                                    | -0.065                  |

---



---

| <b>MFLNH III</b> | <b>DFpLNnH</b> | <b>DFLNHa</b> | <b>Proteobacteria</b> |
|------------------|----------------|---------------|-----------------------|
| -0.408           | -0.440*        | 0.781**       | 0.090                 |
| -0.474*          | 0.109          | -0.355        | -0.503*               |
| 0.311            | -0.481*        | 0.124         | 0.268                 |
| 0.572**          | 0.215          | 0.063         | 0.246                 |
| 0.741**          | -0.065         | -0.263        | 0.374                 |
| 0.582**          | -0.176         | -0.053        | 0.596**               |
| -0.475*          | -0.342         | 0.595**       | 0.182                 |
| -0.364           | -0.284         | 0.360         | 0.222                 |
| 0.505*           | -0.103         | -0.062        | 0.254                 |
| 0.110            | 0.617**        | -0.495*       | -0.328                |
| 0.618**          | 0.018          | -0.424        | 0.259                 |
| 0.374            | 0.190          | 0.152         | 0.289                 |
| -0.388           | 0.480*         | -0.367        | -0.311                |
| -0.621**         | 0.231          | 0.163         | -0.134                |
| -0.393           | -0.256         | 0.433         | 0.165                 |
| -0.15            | -0.132         | -0.014        | 0.077                 |
| 0.812**          | 0.493*         | -0.346        | 0.238                 |
| 0.083            | 0.792**        | -0.203        | -0.206                |
| 0.666**          | 0.235          | -0.134        | 0.147                 |
| 1.000            | 0.062          | -0.230        | 0.314                 |
| 0.062            | 1.000          | -0.296        | -0.028                |
| -0.230           | -0.296         | 1.000         | -0.080                |
| 0.314            | -0.028         | -0.080        | 1.000                 |
| -0.236           | -0.028         | -0.015        | -0.854**              |
| -0.138           | 0.115          | 0.098         | -0.446*               |
| -0.402           | 0.012          | 0.280         | -0.553**              |
| -0.106           | -0.115         | 0.733**       | -0.090                |
| -0.349           | -0.313         | 0.325         | -0.045                |
| -0.273           | -0.085         | 0.417         | -0.026                |
| -0.408           | -0.132         | 0.428         | -0.140                |
| -0.232           | 0.011          | 0.413         | 0.097                 |

---



---

| <b>Firmicutes</b> | <b>Bacteroidetes</b> | <b>Actinobacteria</b> | <b>Acidobacteria</b> |
|-------------------|----------------------|-----------------------|----------------------|
| -0.125            | -0.051               | 0.211                 | 0.580**              |
| 0.410             | 0.279                | 0.246                 | -0.236               |
| -0.149            | -0.201               | -0.355                | -0.168               |
| -0.283            | 0.008                | -0.205                | 0.313                |
| -0.216            | -0.268               | -0.481*               | -0.312               |
| -0.407            | -0.412               | -0.444*               | -0.169               |
| -0.190            | -0.122               | 0.224                 | 0.477*               |
| -0.191            | -0.157               | 0.044                 | 0.146                |
| -0.147            | -0.173               | -0.351                | -0.253               |
| 0.243             | 0.244                | 0.088                 | -0.219               |
| -0.173            | -0.088               | -0.564**              | -0.517*              |
| -0.260            | -0.125               | -0.164                | 0.269                |
| 0.221             | 0.234                | 0.199                 | -0.236               |
| -0.055            | 0.300                | 0.245                 | 0.117                |
| -0.149            | -0.149               | 0.279                 | 0.286                |
| -0.071            | -0.028               | -0.015                | -0.043               |
| -0.141            | -0.139               | -0.422                | -0.192               |
| 0.068             | 0.294                | 0.014                 | 0.025                |
| -0.121            | -0.080               | -0.020                | 0.215                |
| -0.236            | -0.138               | -0.402                | -0.106               |
| -0.028            | 0.115                | 0.012                 | -0.115               |
| -0.015            | 0.098                | 0.280                 | 0.733**              |
| -0.854**          | -0.446*              | -0.553**              | -0.090               |
| 1.000             | -0.078               | 0.526*                | 0.049                |
| -0.078            | 1.000                | 0.037                 | -0.035               |
| 0.526*            | 0.037                | 1.000                 | 0.504*               |
| 0.049             | -0.034               | 0.504*                | 1.000                |
| 0.082             | -0.106               | 0.206                 | 0.247                |
| 0.017             | -0.107               | 0.457*                | 0.774**              |
| 0.014             | 0.137                | 0.440*                | 0.558**              |
| -0.044            | -0.174               | 0.174                 | 0.239                |

---



---

| Cyanobacteria | Chloroflexi | Planctomycetes | [Thermi] |
|---------------|-------------|----------------|----------|
| 0.599**       | 0.504*      | 0.482*         | 0.427    |
| -0.124        | -0.156      | -0.032         | -0.126   |
| -0.232        | -0.319      | -0.273         | -0.077   |
| -0.187        | 0.247       | -0.138         | -0.126   |
| -0.336        | -0.365      | -0.372         | -0.266   |
| -0.016        | -0.232      | -0.272         | 0.054    |
| 0.468*        | 0.573**     | 0.438*         | 0.357    |
| 0.623**       | 0.218       | 0.274          | 0.207    |
| -0.253        | -0.371      | -0.294         | -0.107   |
| -0.270        | -0.173      | -0.124         | -0.147   |
| -0.500*       | -0.526*     | -0.478*        | -0.392   |
| -0.146        | 0.286       | -0.148         | 0.062    |
| -0.209        | -0.226      | -0.159         | -0.116   |
| 0.288         | 0.222       | 0.357          | 0.056    |
| 0.424         | 0.410       | 0.347          | 0.229    |
| -0.058        | 0.039       | 0.386          | -0.140   |
| -0.489*       | -0.277      | -0.478*        | -0.155   |
| -0.319        | 0.048       | -0.162         | -0.135   |
| -0.157        | 0.001       | -0.185         | -0.065   |
| -0.349        | -0.273      | -0.408         | -0.232   |
| -0.313        | -0.085      | -0.132         | 0.011    |
| 0.325         | 0.417       | 0.428          | 0.413    |
| -0.045        | -0.026      | -0.140         | 0.097    |
| 0.082         | 0.017       | 0.014          | -0.044   |
| -0.106        | -0.107      | 0.137          | -0.174   |
| 0.206         | 0.457*      | 0.440*         | 0.174    |
| 0.247         | 0.774**     | 0.558**        | 0.239    |
| 1.000         | 0.175       | 0.229          | 0.0316   |
| 0.175         | 1.000       | 0.687**        | 0.236    |
| 0.229         | 0.687**     | 1.000          | 0.096    |
| 0.032         | 0.236       | 0.096          | 1.000    |
|               |             |                |          |
|               |             |                |          |
|               |             |                |          |
